# Supplementary material
Source: Springer Nature journal article supplement (https://www.springermedizin.de/resource/supplementary/12872_2009_268_MOESM1_ESM.pdf/9431370)
Supplement: MOESM1 [file 9431370]

Practice List

Identify South Asian subjects using Nam Pechan

GP Screens Lists

South Asian and Black African-Caribbean subjects confirmed

Sampling frame

Invitation letters

Reminder including telephone reminder

Arrange screening

Screening

Analysis and write up

Send report to GP
